# Supplementary material
Source: publisher figshare collection journal article supplement (https://acs.figshare.com/ndownloader/files/4047553)

# Supporting Information

## Solvent-Free Methallylboration of Ketones Accelerated by *tert*-Alcohols

Yongda Zhang,\* Ning Li, Navneet Goyal, Guisheng Li, Heewon Lee, Bruce Z. Lu, Chris H. Senanayake

*Chemical Development, Boehringer Ingelheim Pharmaceutical, Inc.  
900 Ridgebury Road, Ridgefield, CT 06877*

*E-mail: yongda.zhang@boehringer-ingelheim.com*

- I. General Methods (page SI-1)
- II. <sup>1</sup>H-NMR and <sup>13</sup>C NMR of key new compounds (page SI-2)

**General Methods.** All reactions were carried out under an atmosphere of nitrogen in dry glassware with magnetic stirring. Commercially available Mg turning, ketones, anhydrous THF and alcohols are received and used without any further purification. Column chromatography was performed on silica gel 60 (230-400 mesh). Thin layer chromatography was performed on 0.25 mm silica gel 60-F plates. Visualization was accomplished with UV light, KMnO<sub>4</sub>, aqueous ceric ammonium molybdate, or bromocresol green dips followed by heating.

<sup>1</sup>H NMR and spectra were recorded at ambient temperature. Data are reported as follows: chemical shift in parts per million ( $\delta$ , ppm) from an internal standard [tetramethylsilane (TMS) or deuterated chloroform (CDCl<sub>3</sub>)], multiplicity (s = singlet, d = doublet, t = triplet, q = quartet and m = multiplet), integration, and coupling constant (Hz). <sup>13</sup>C NMR and spectra were recorded at ambient temperature. Chemical shifts are reported in ppm from CDCl<sub>3</sub> taken as 77.0 ppm.

# 2-(2-Methylallyl)-1,3,2-dioxaborinane 1

102870-021

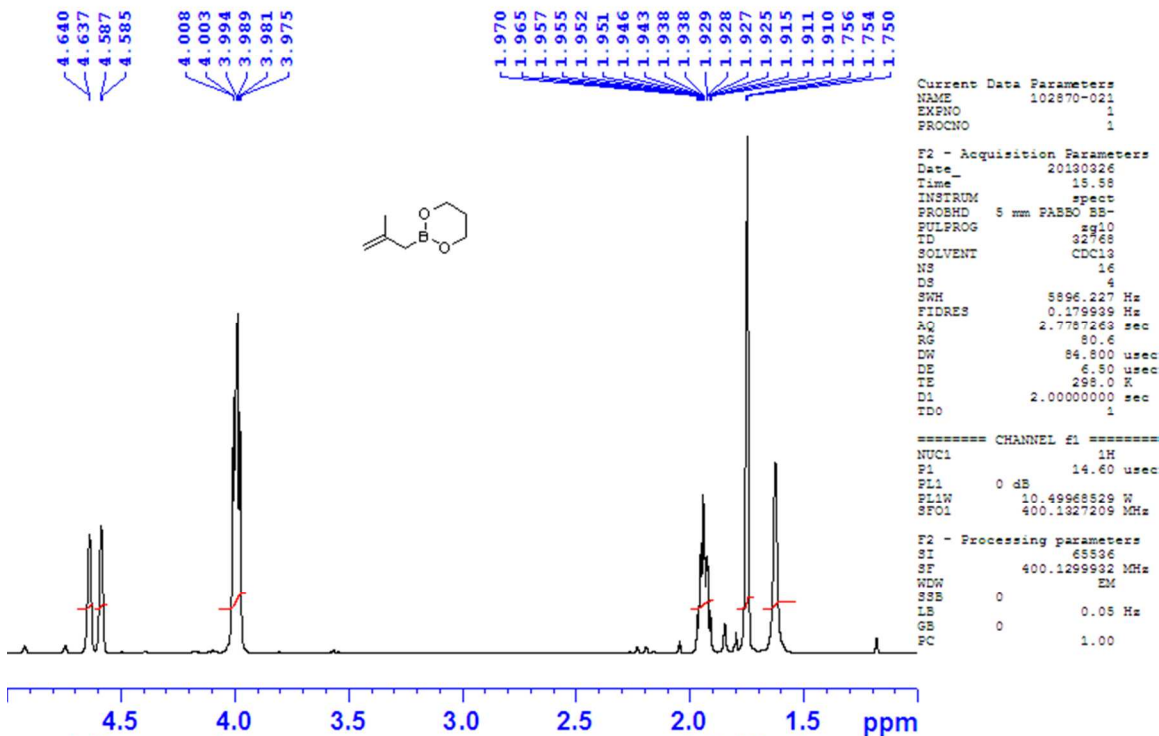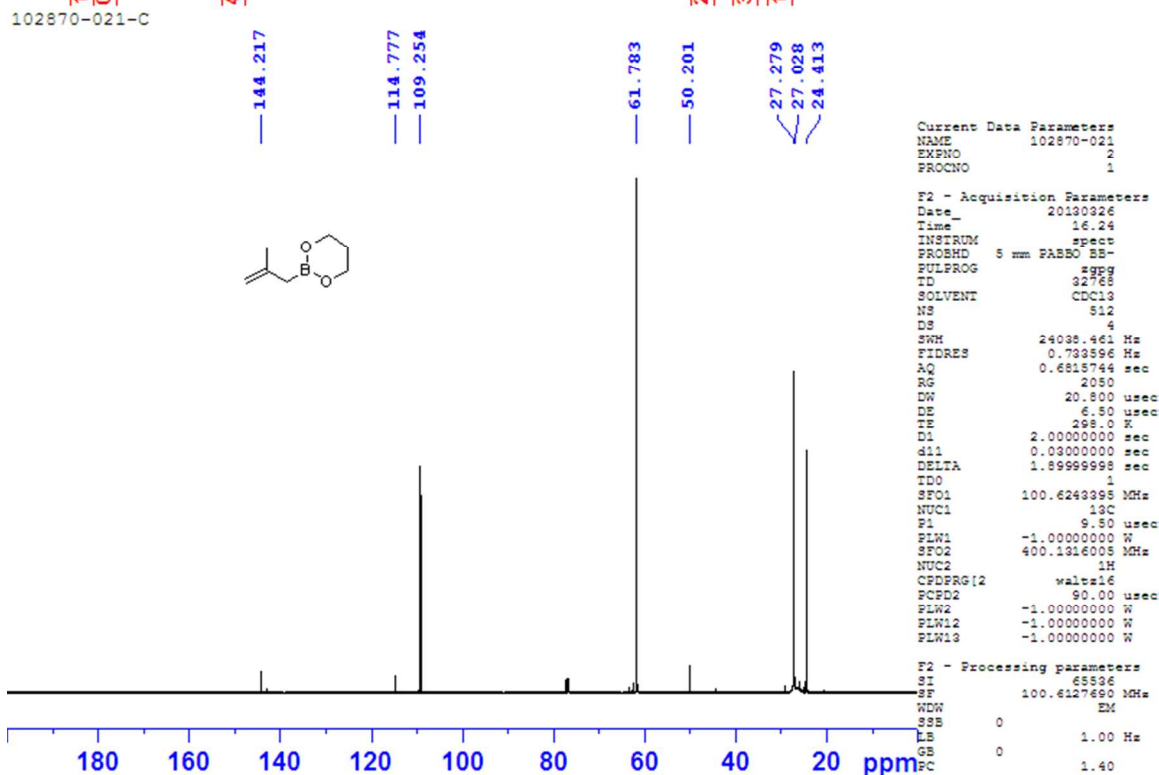

# 2-(2-Methoxyphenyl)-4-methylpent-4-en-2-ol 3

102478-043-H

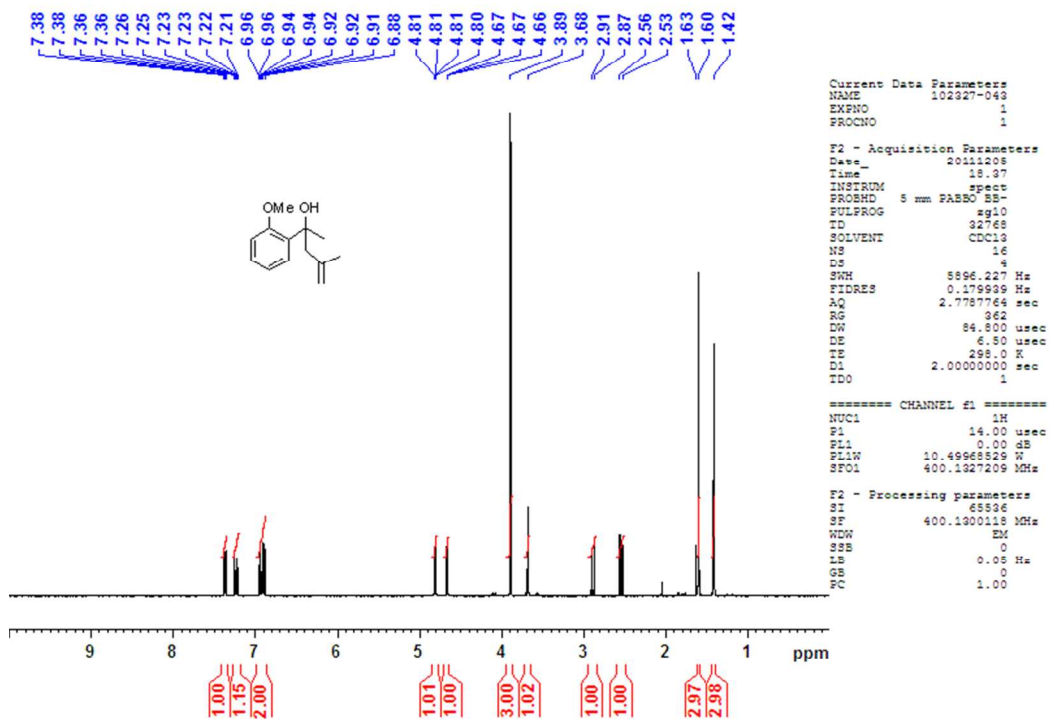

102327-043

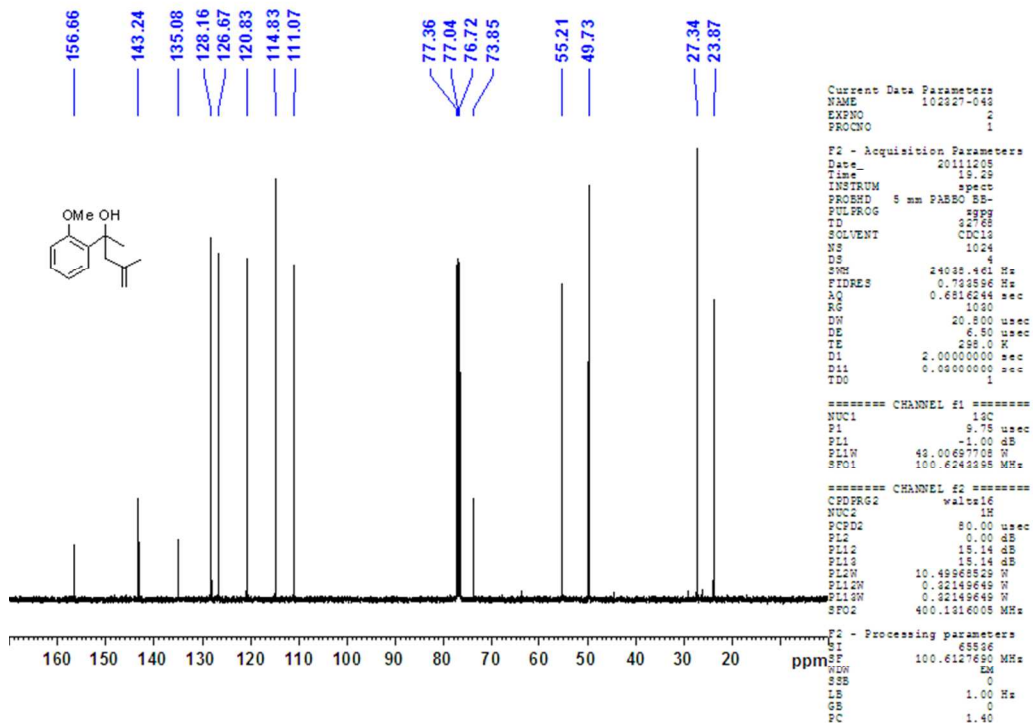

# 4-Methyl-2-(naphthalen-2-yl)pent-4-en-2-ol 5

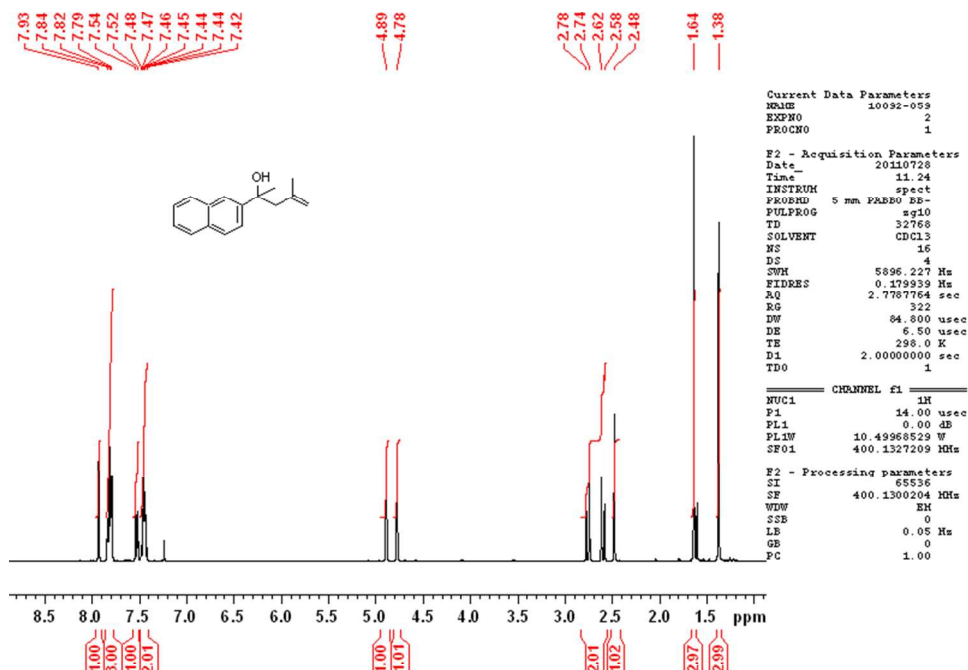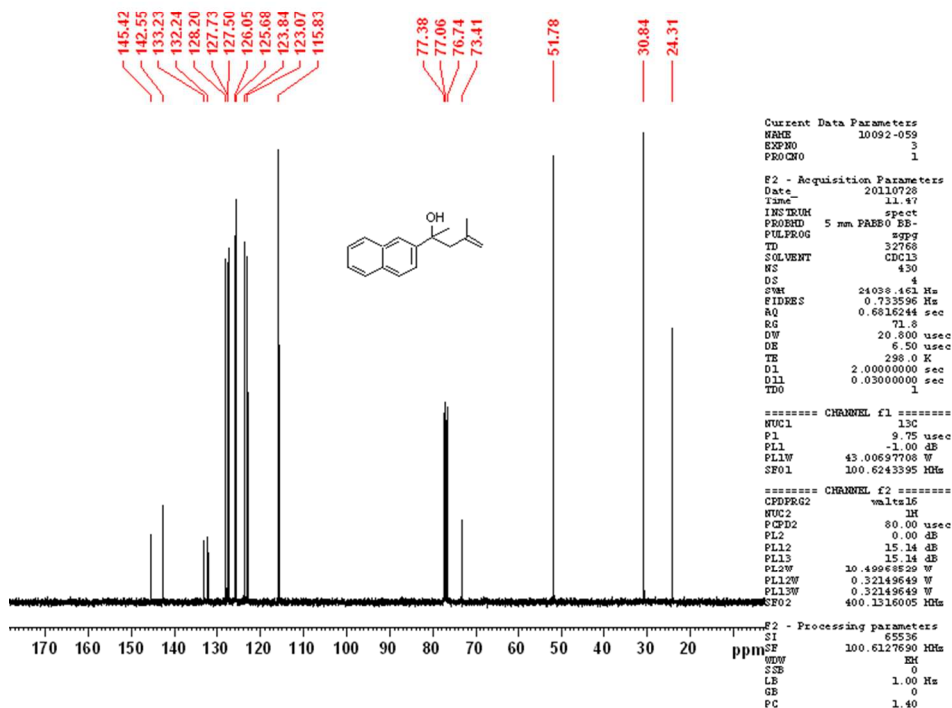

# 2-(2,5-Dimethoxyphenyl)-4-methylpent-4-en-2-ol 7

102327-072

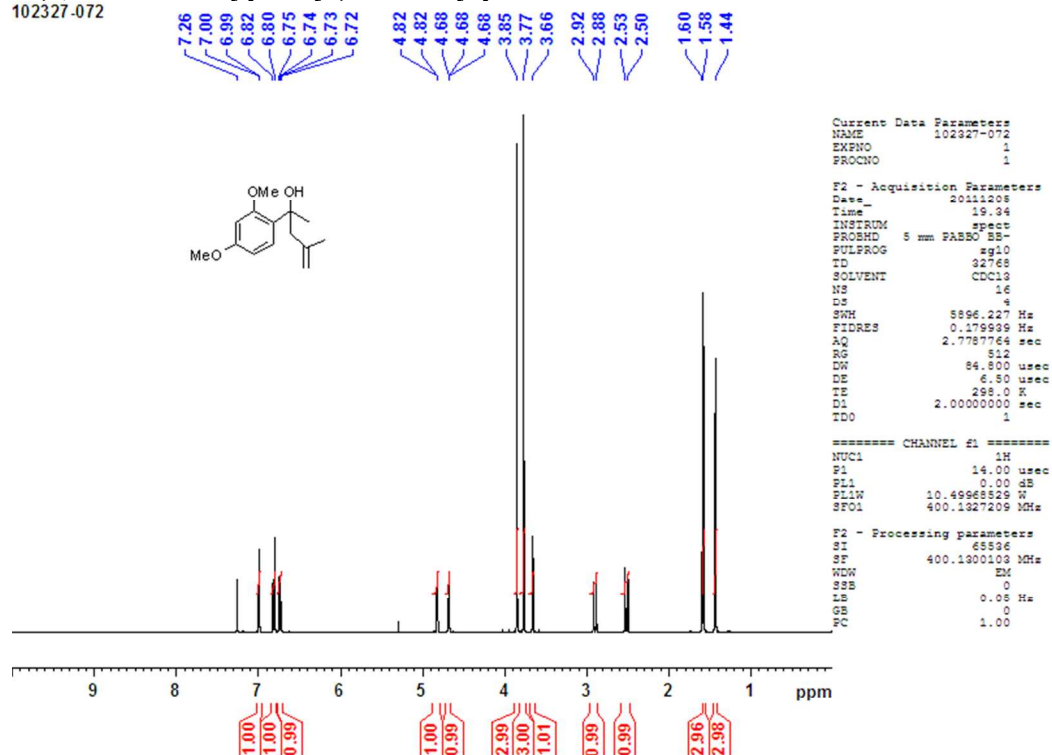

102327-072-product

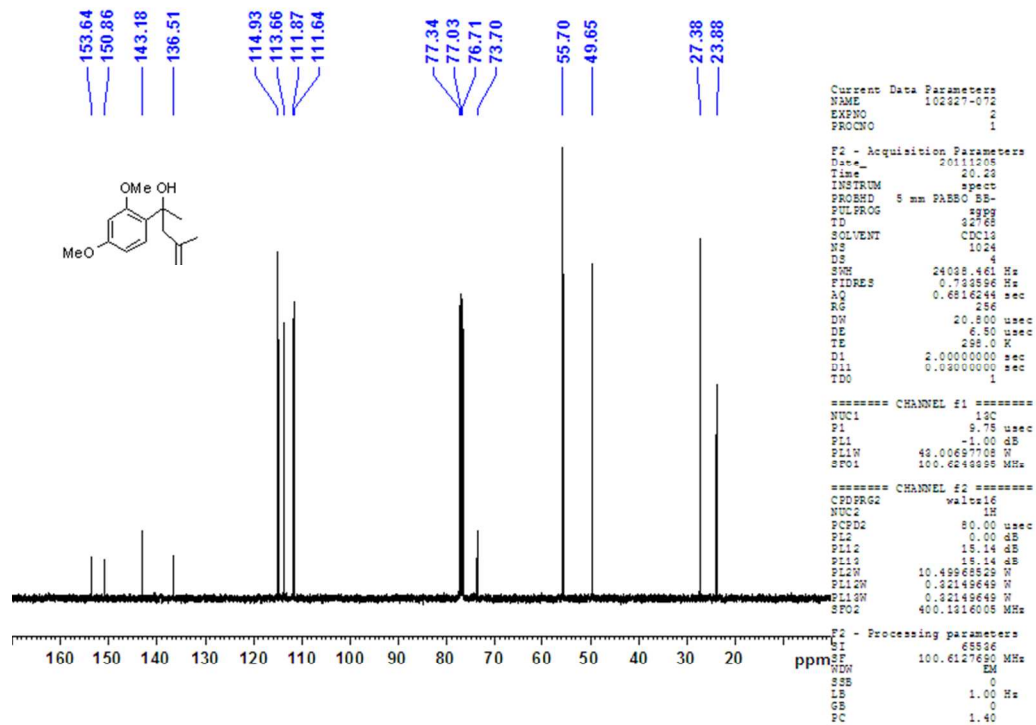

# 2-(Benzo[d][1,3]dioxol-5-yl)-4-methylpent-4-en-2-ol 9

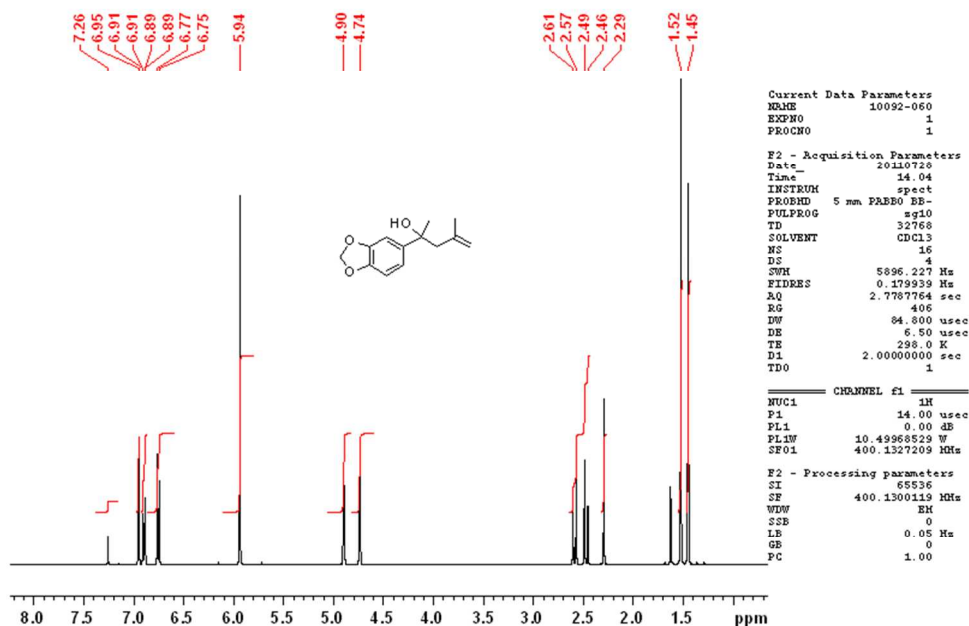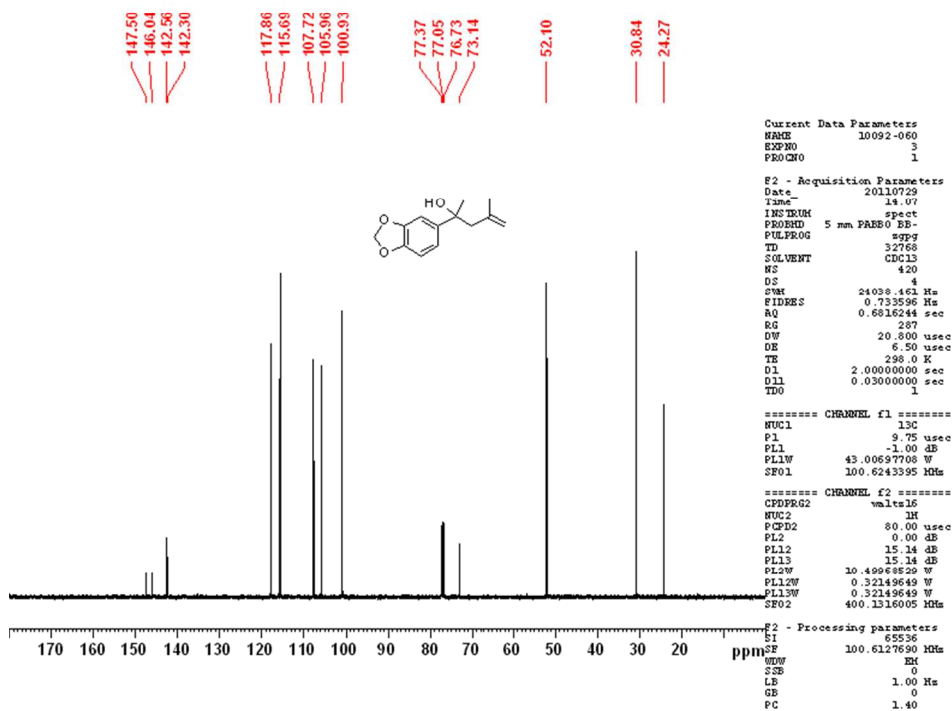

# 1-Bromo-2-(4-methoxyphenyl)-4-methylpent-4-en-2-ol 11

102464-052

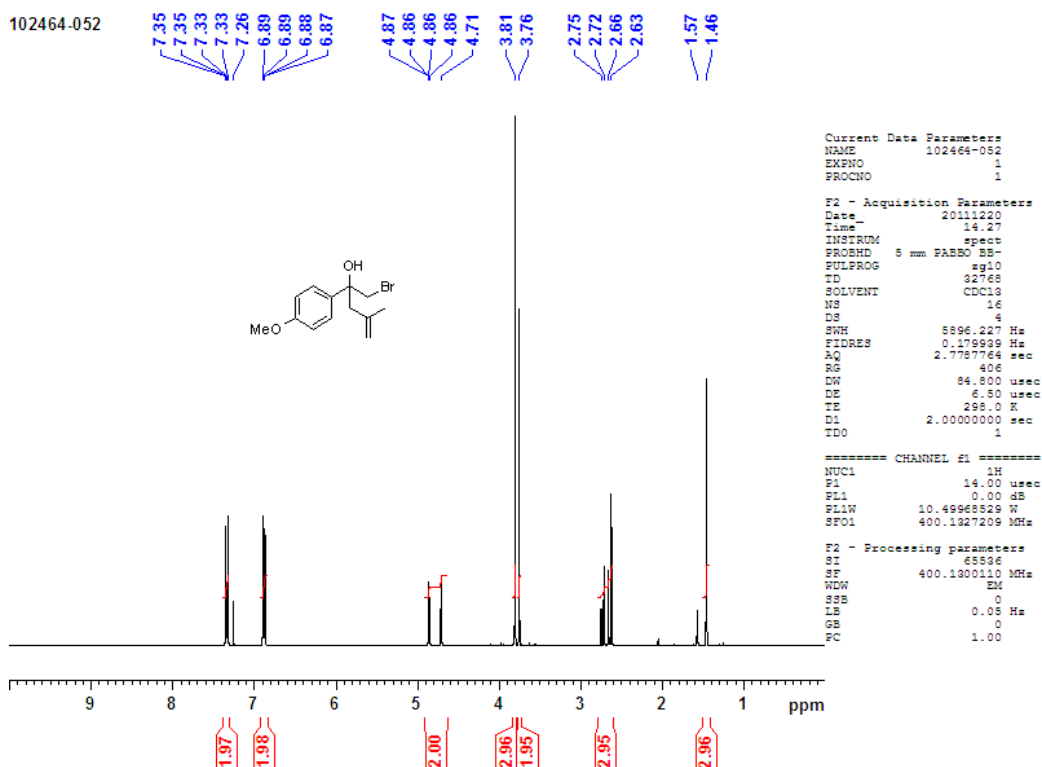

102464-052

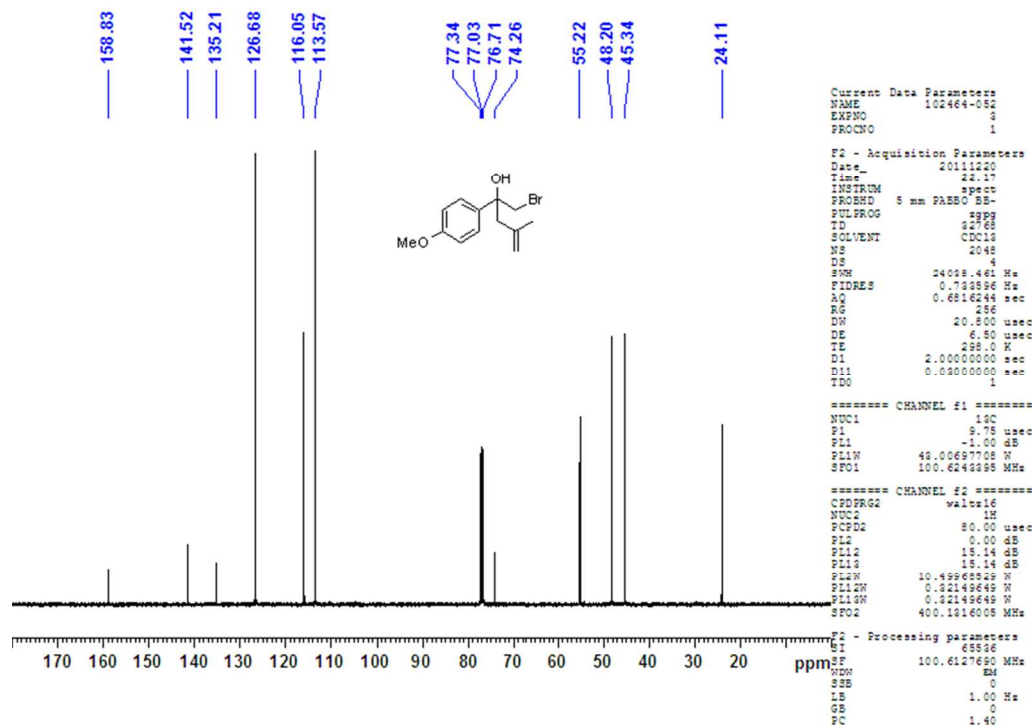

# 3-Hydroxy-3-(4-methoxyphenyl)-5-methylhex-5-enenitrile13

102327-078-product

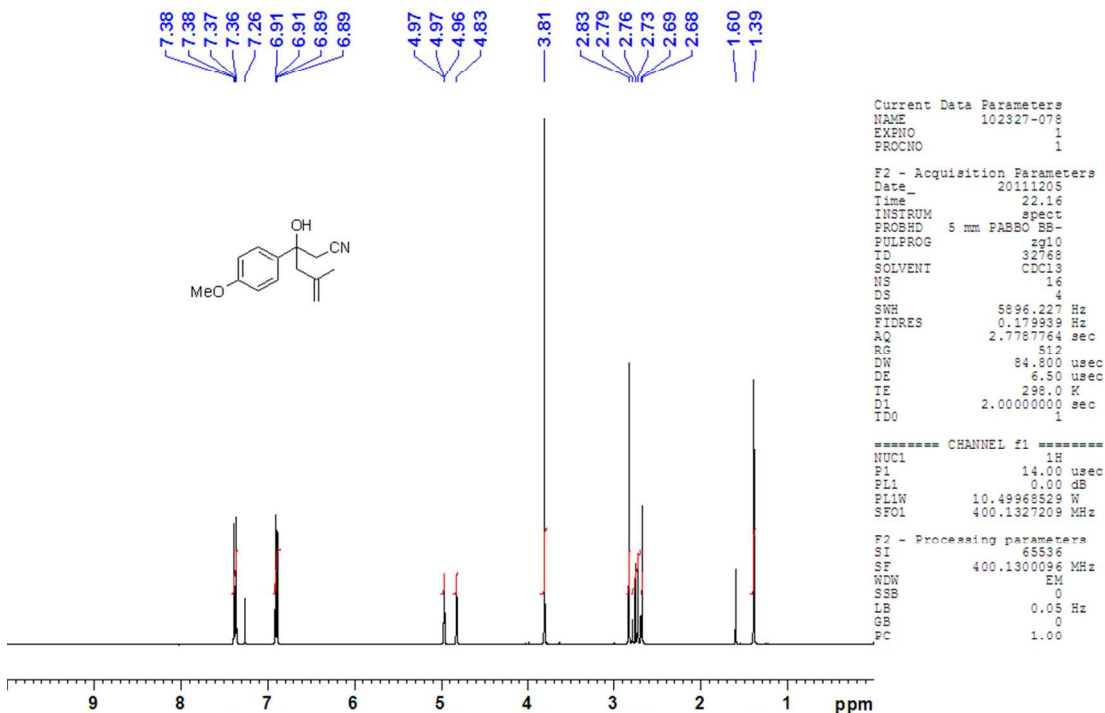

102327-078-product

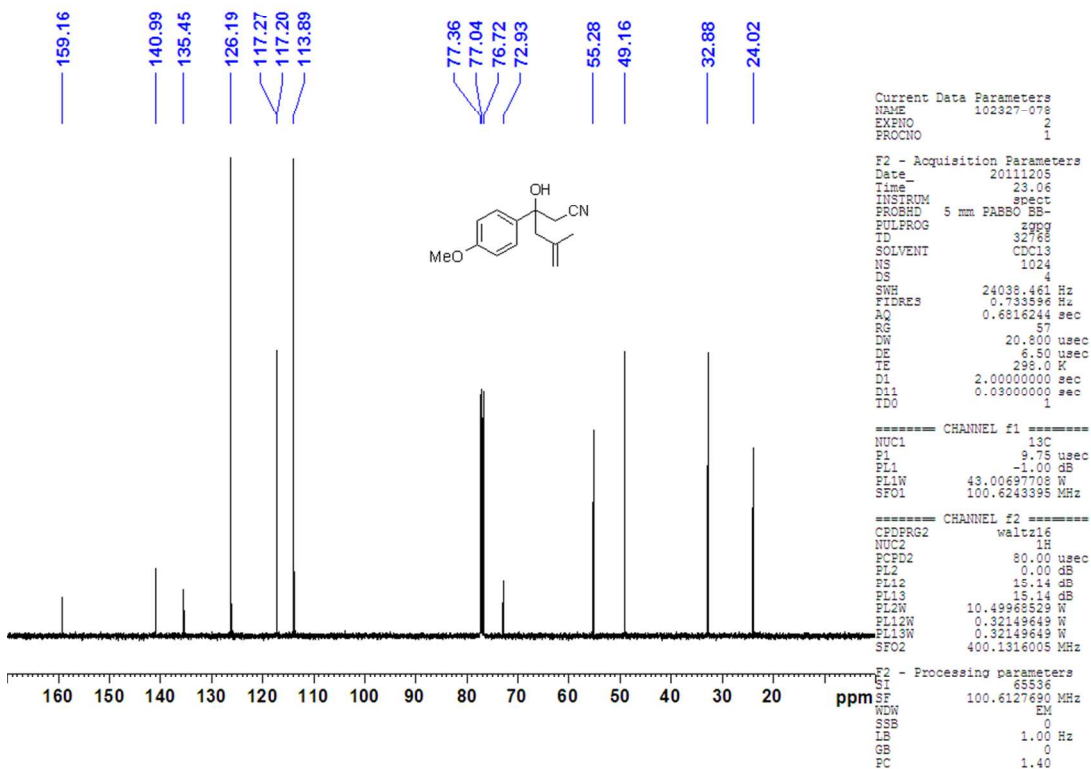



# 1-Chloro-5-methyl-3-phenylhex-5-en-3-ol 15

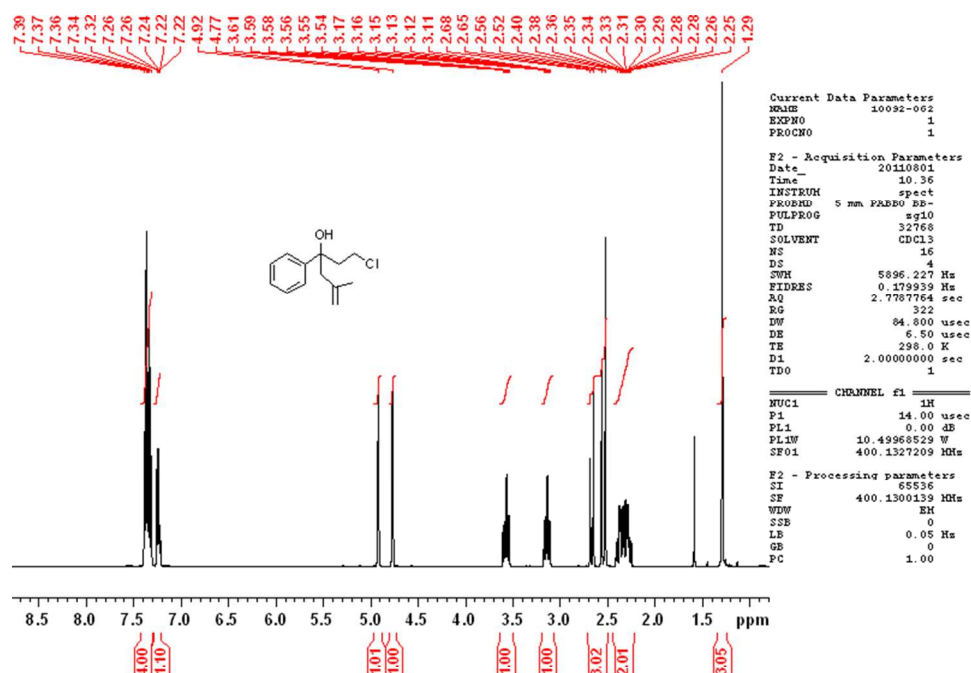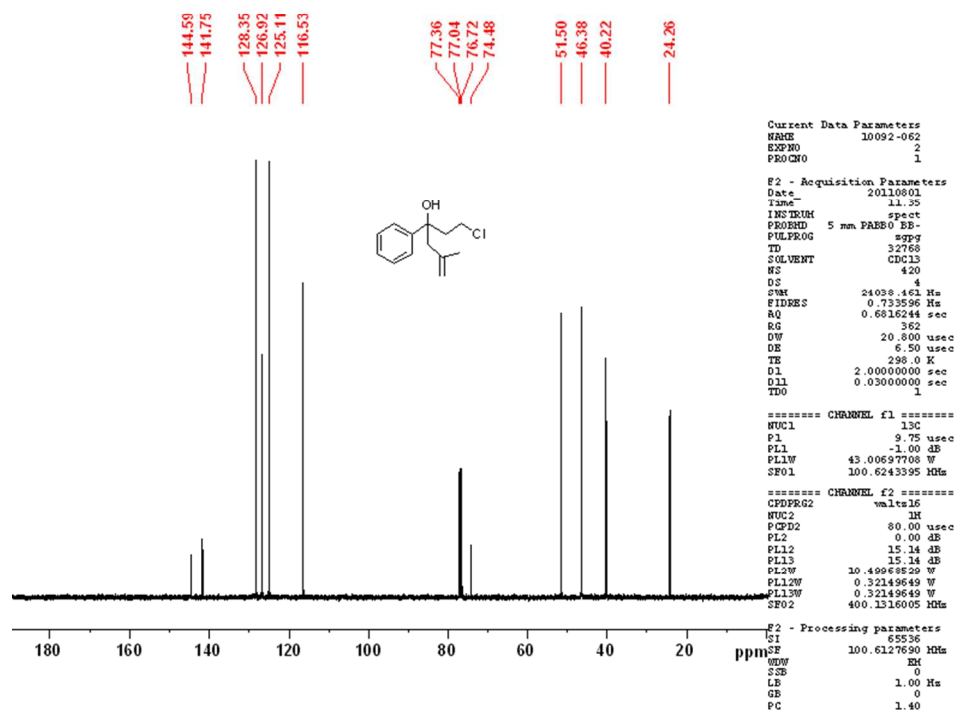

# 1-(2-Methylallyl)-4-phenylcyclohexanol 17

102327-076-product

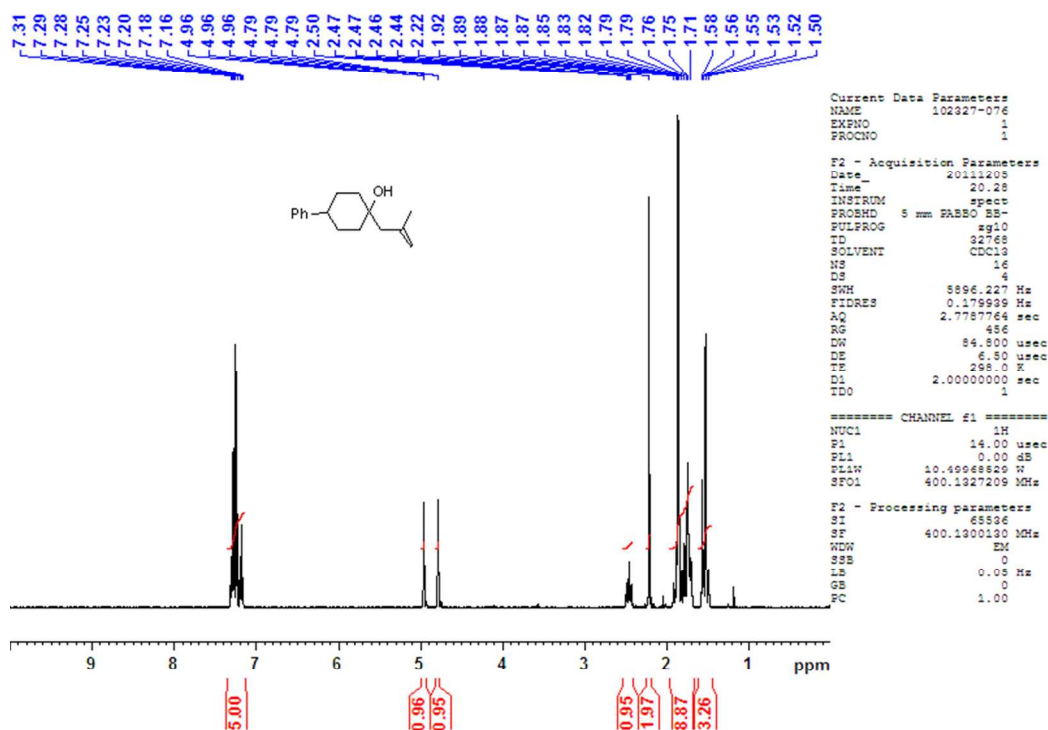

102727-076-product

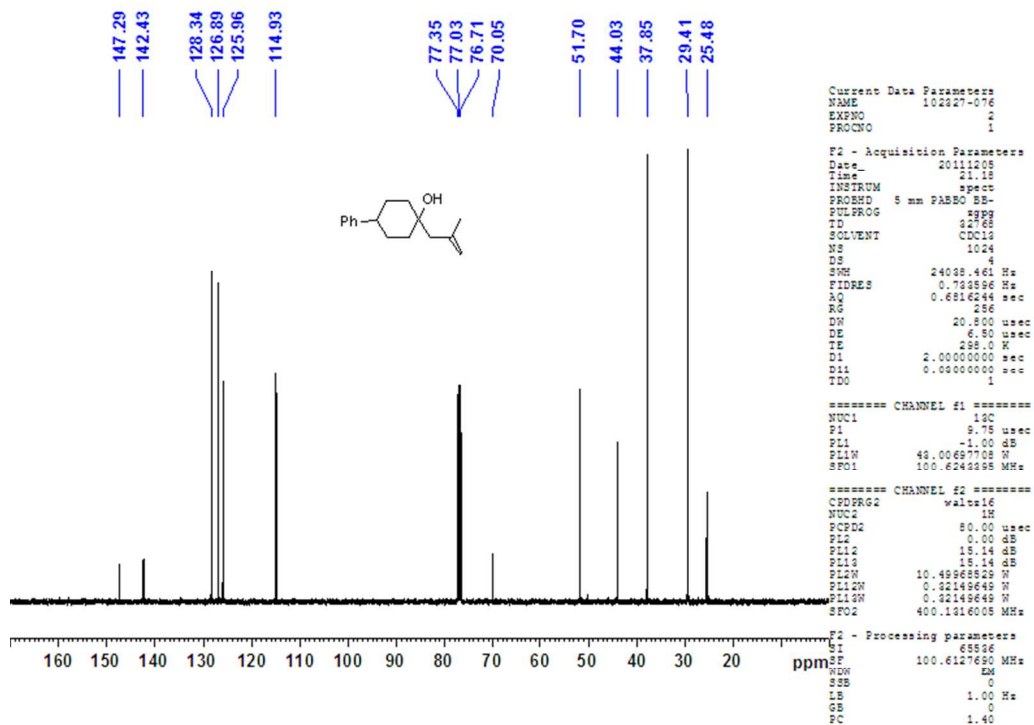

# 8-(2-Methylallyl)-1,4-dioxaspiro[4.5]decan-8-ol 19

102327-077-product

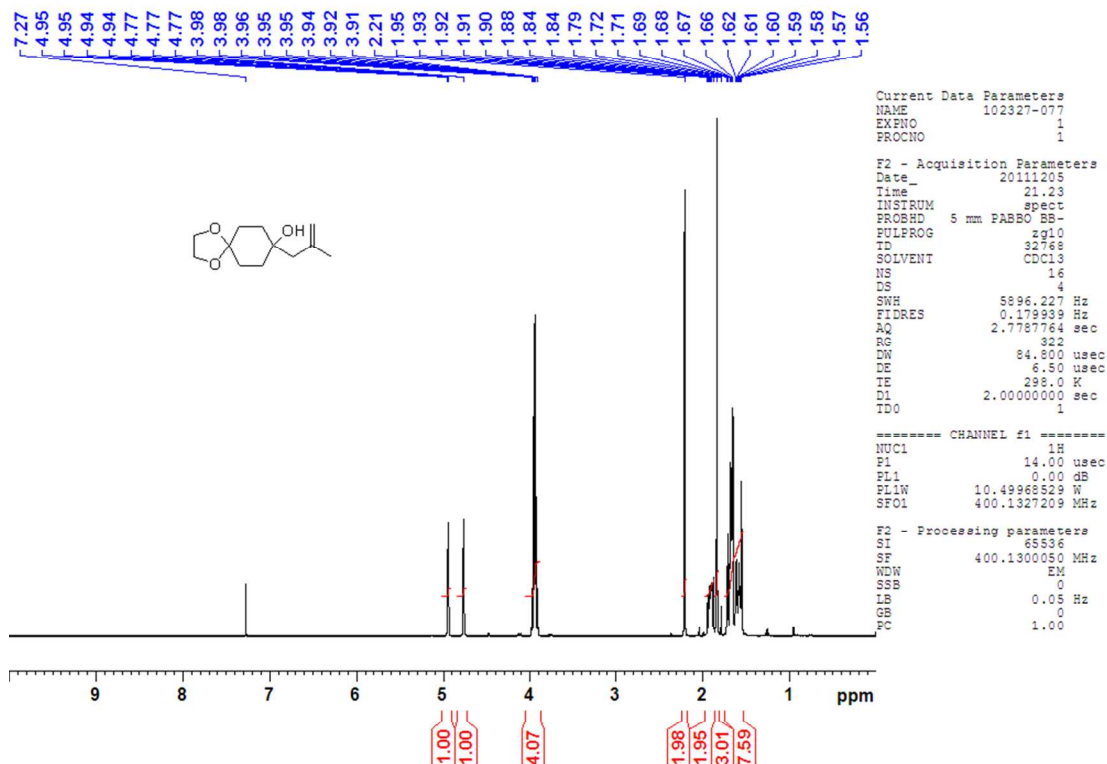

102327-077-product

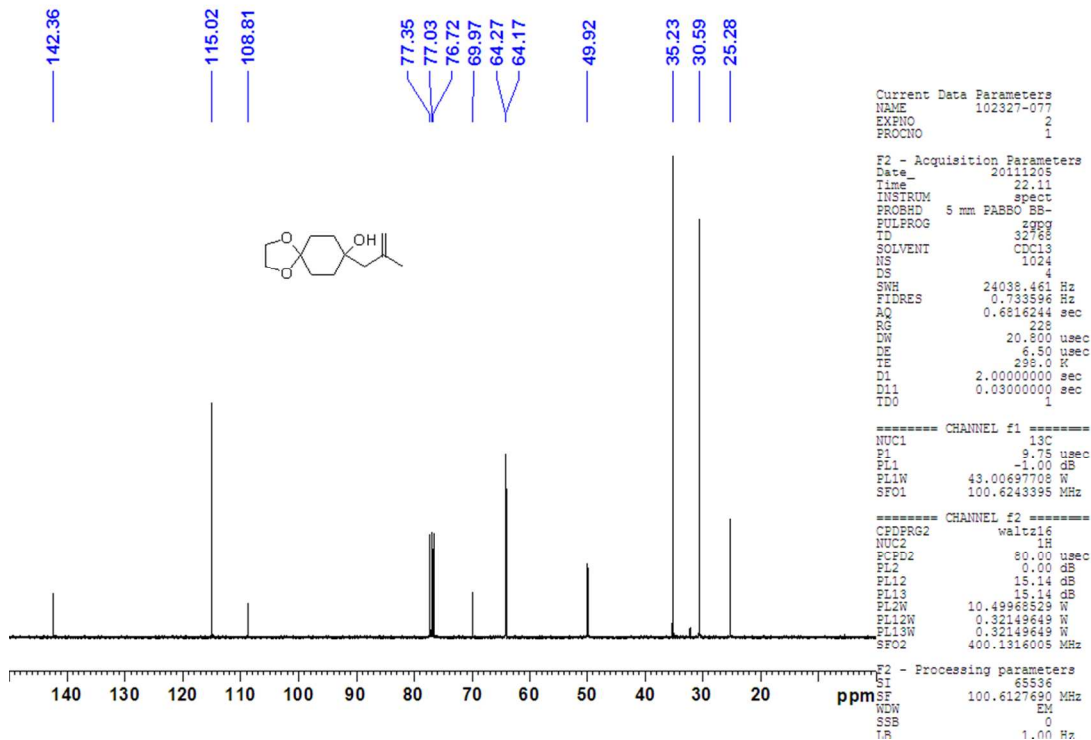

# 4-(2-Hydroxy-4-methylpent-4-en-2-yl)phenyl acetate 21

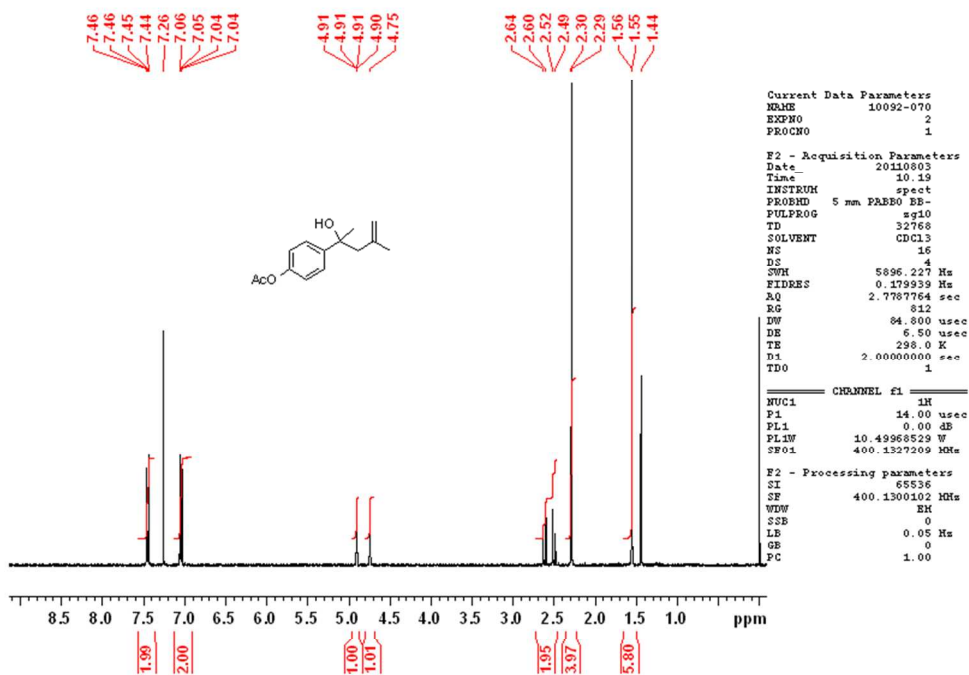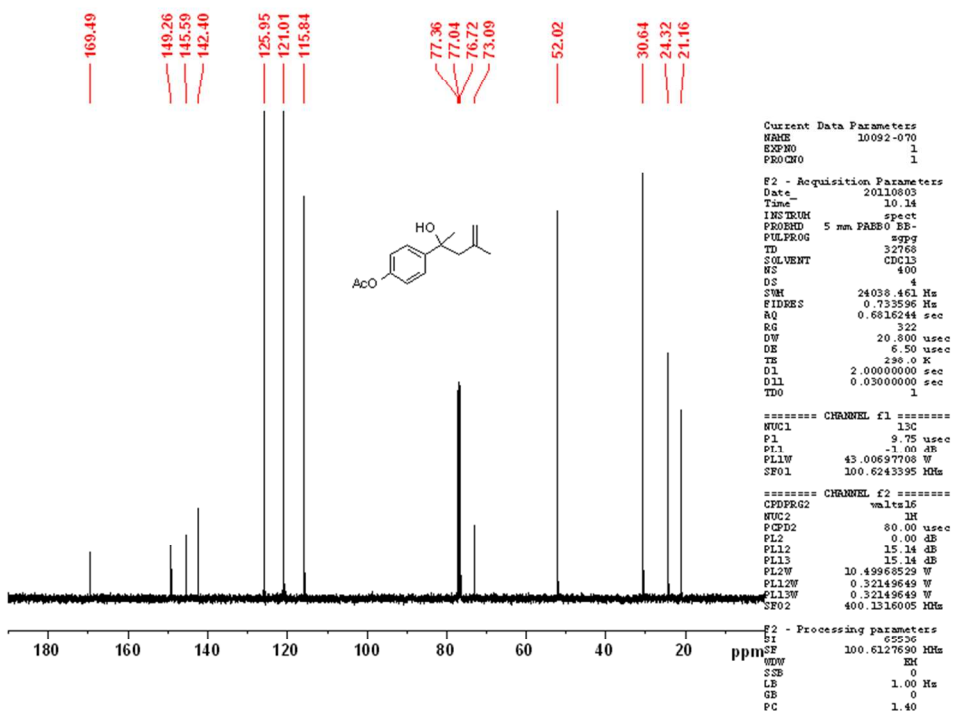

# 4-Methyl-2-(4-(tetrahydro-2H-pyran-2-yloxy)phenyl)pent-4-en-2-ol 23

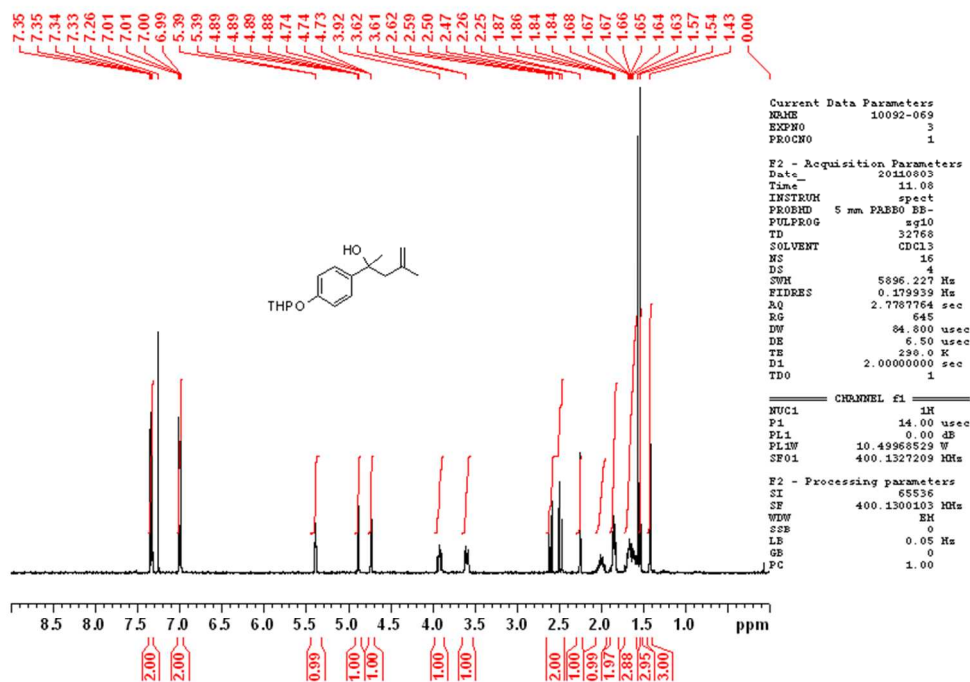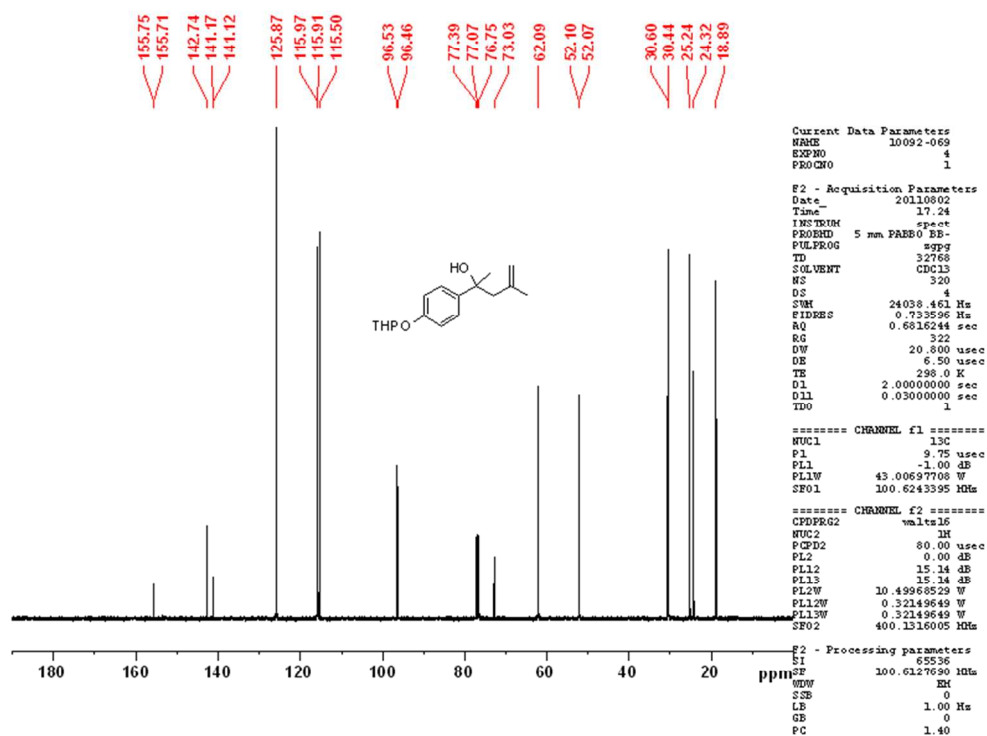

***tert*-Butyl 4-(2-hydroxy-4-methylpent-4-en-2-yl)phenyl carbonate 25**

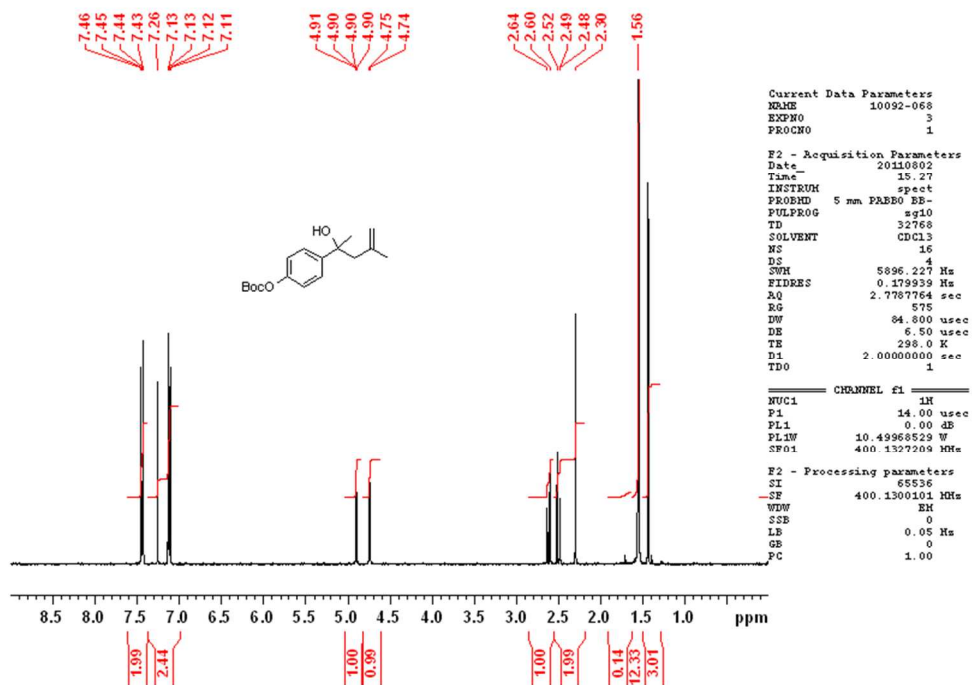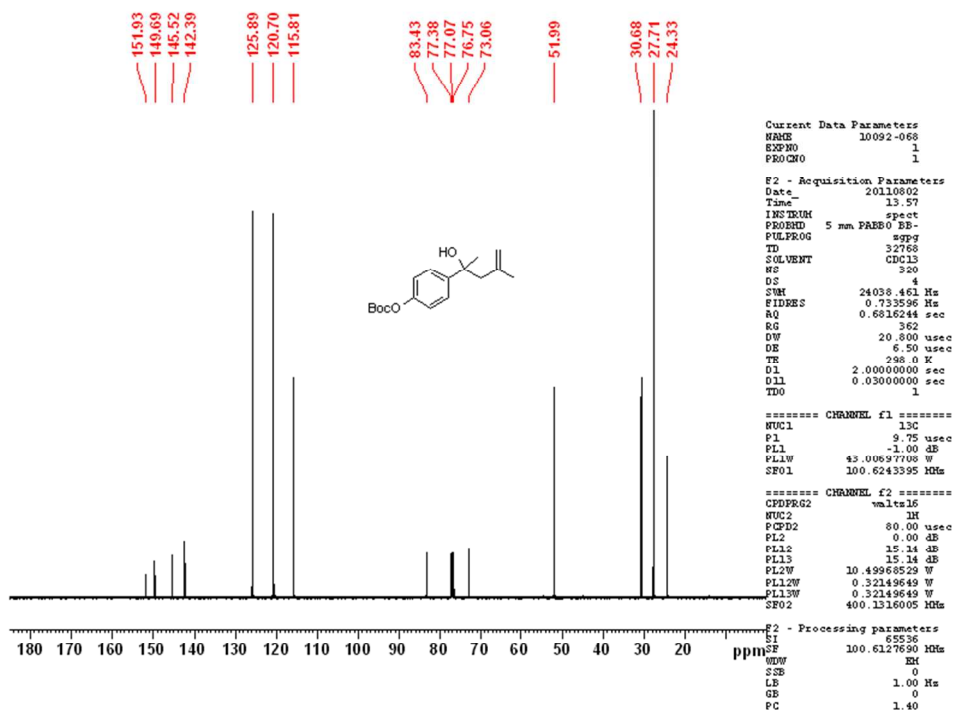

# 4-Methyl-2-(thiophen-2-yl)pent-4-en-2-ol 27

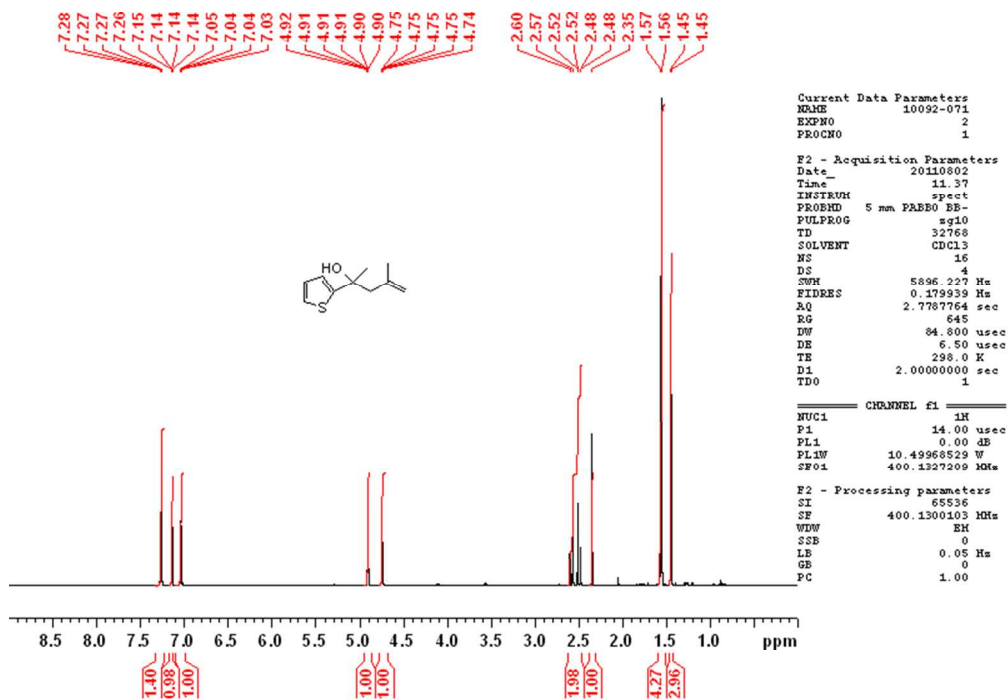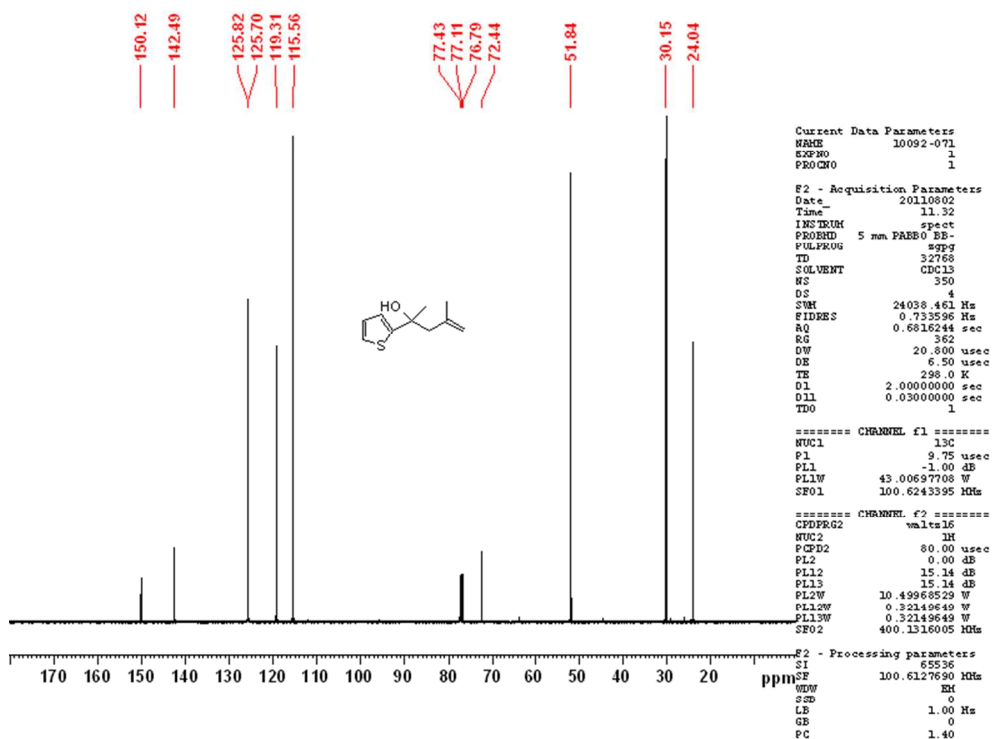

## 2-(Benzofuran-3-yl)-4-methylpent-4-en-2-ol 29

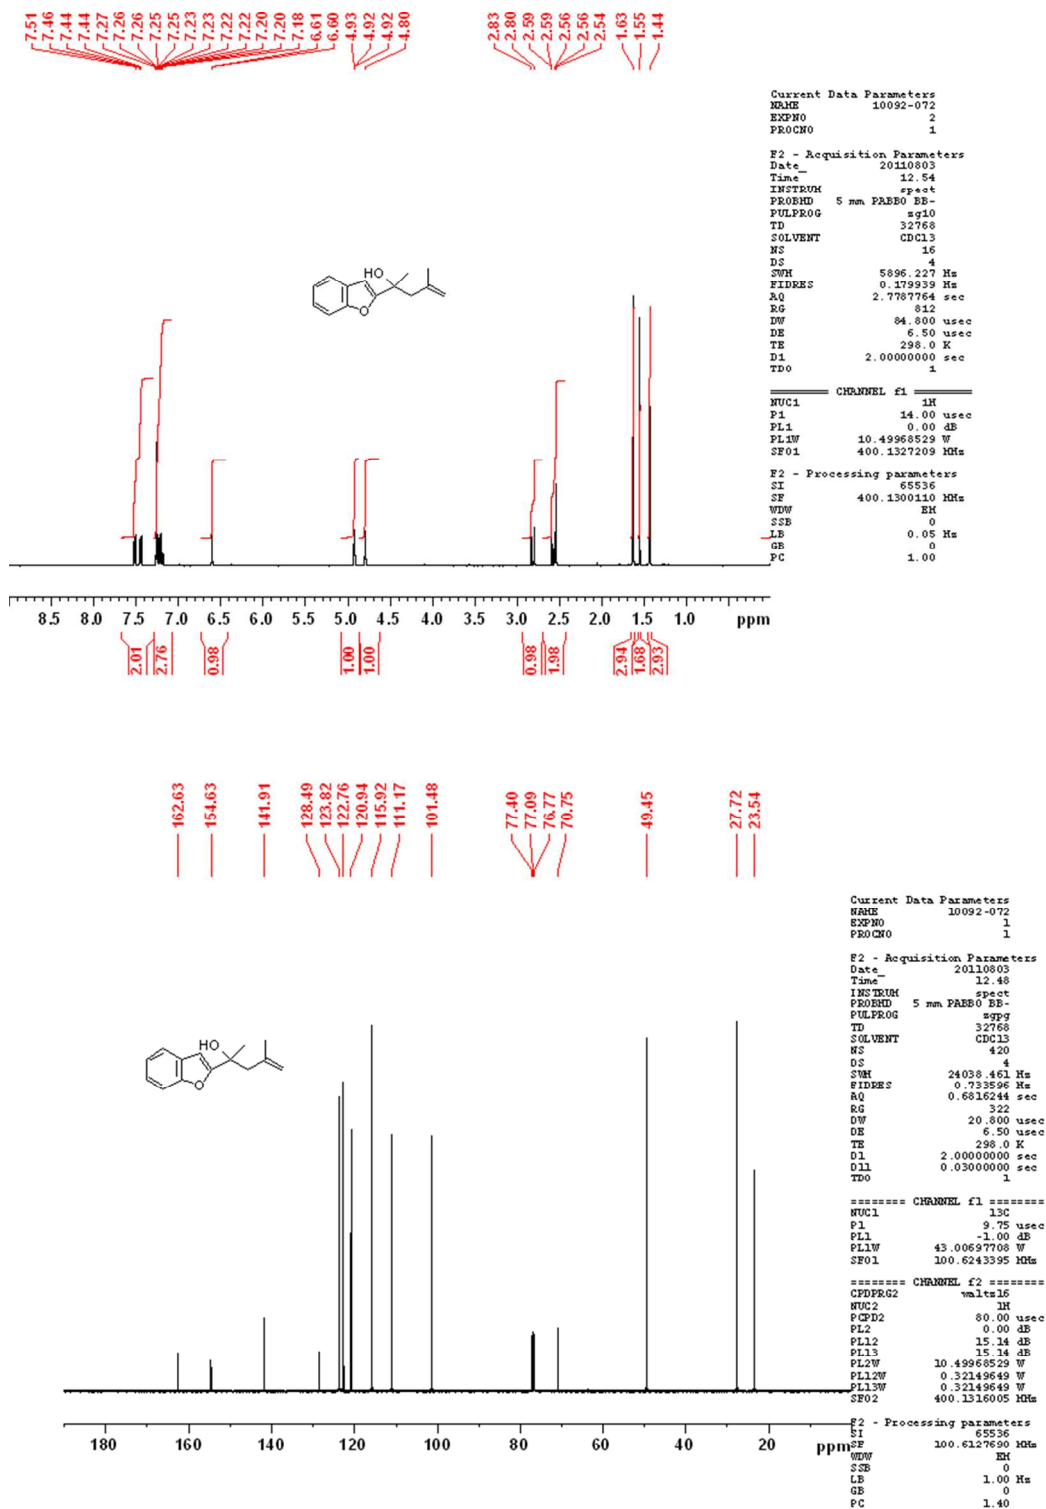



**(1*S*,2*S*,4*R*)-2-Hydroxy-7,7-dimethyl-2-(2-methylallyl)bicyclo[2.2.1]heptane-1-carboxylic acid 31**

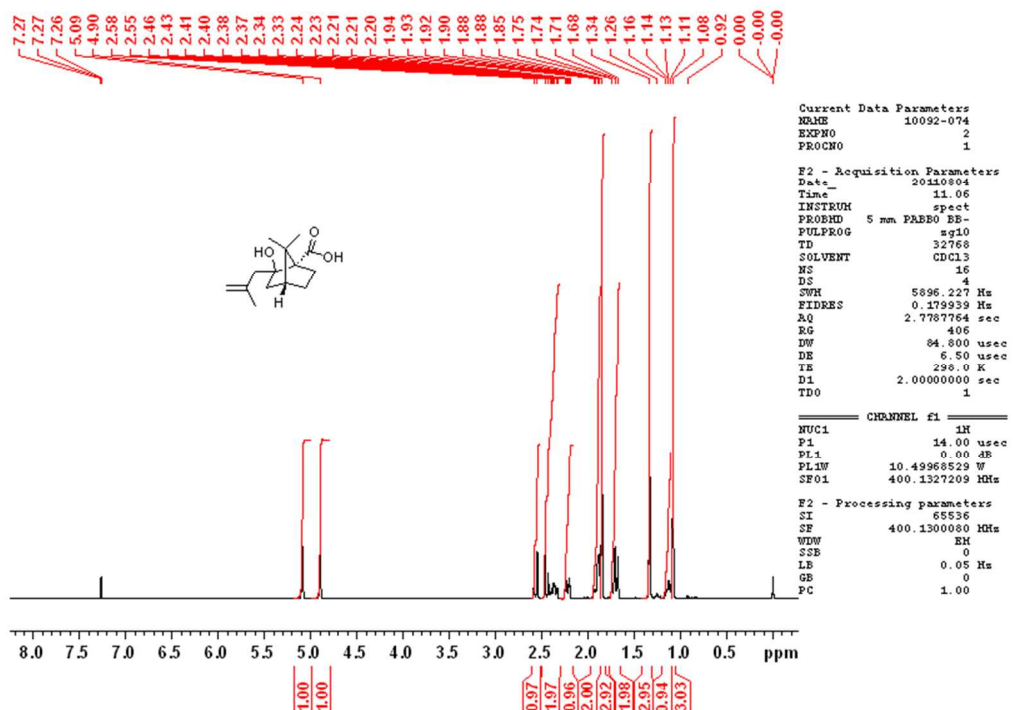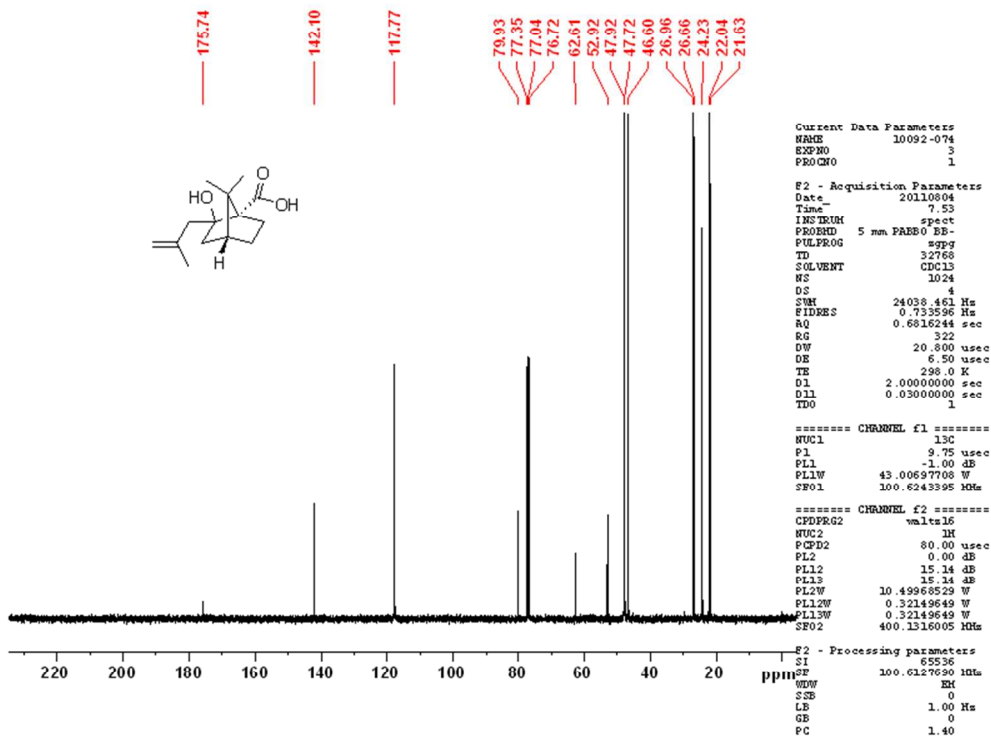

# 1,2-Bis(4-methoxyphenyl)-4-methylpent-4-ene-1,2-diol 33

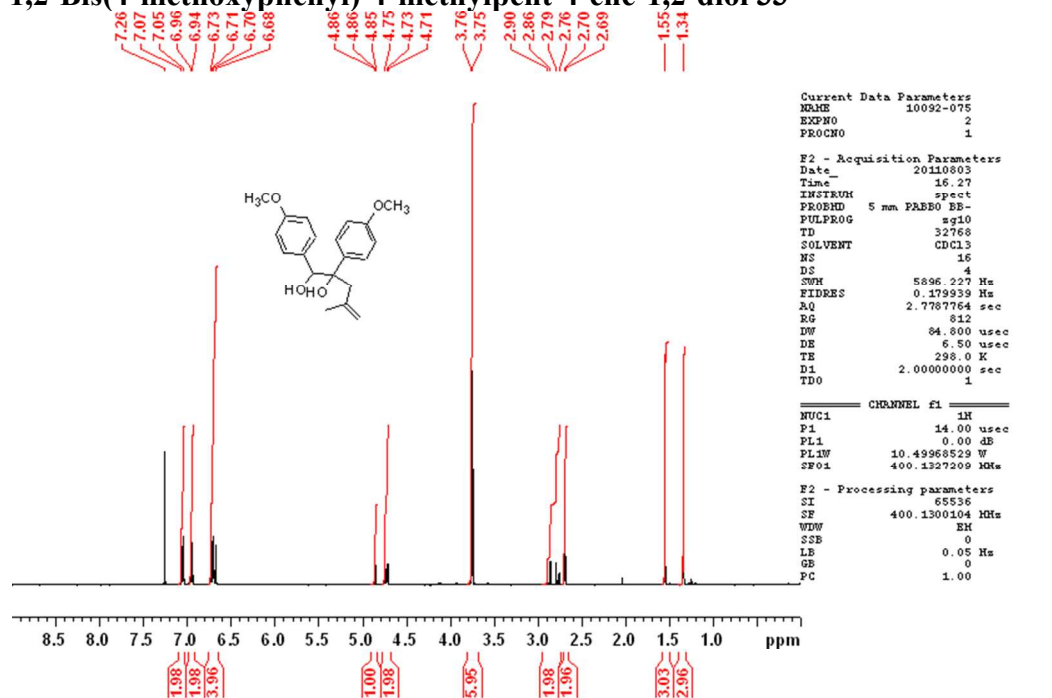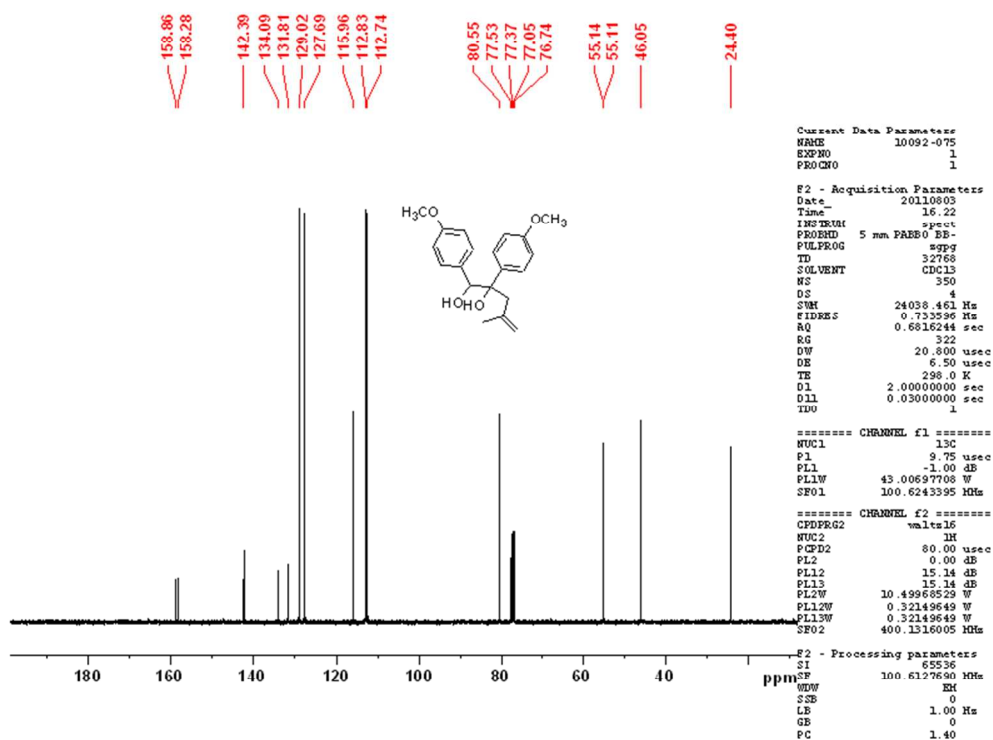

**1-(2-Methylallyl)-6-(4,4,5,5-tetramethyl-1,3,2-dioxaborolan-2-yl)-2,3-dihydro-1H-inden-1-ol 35**

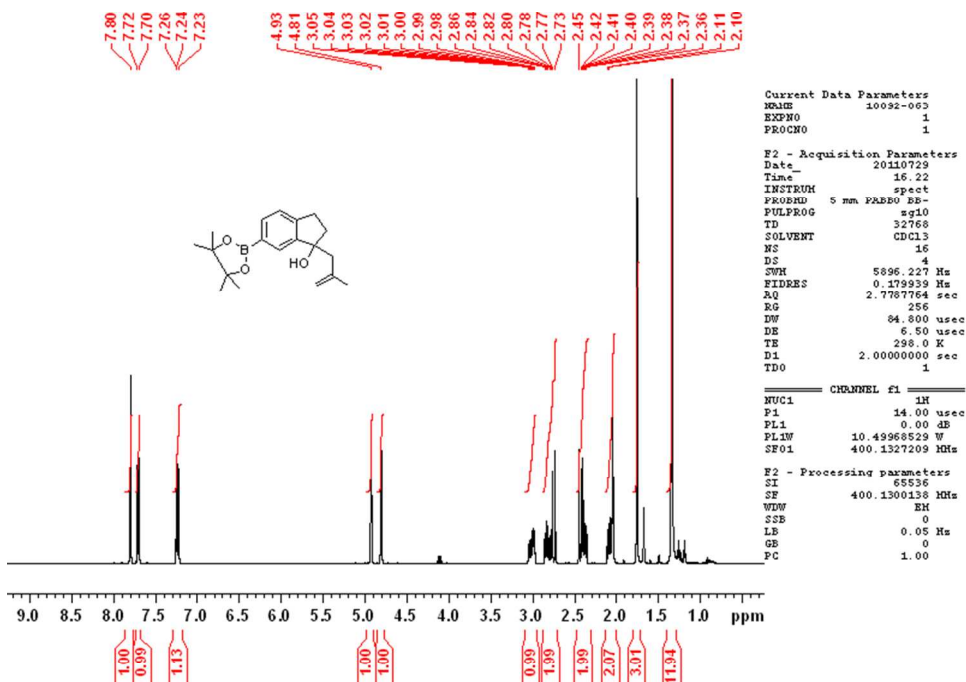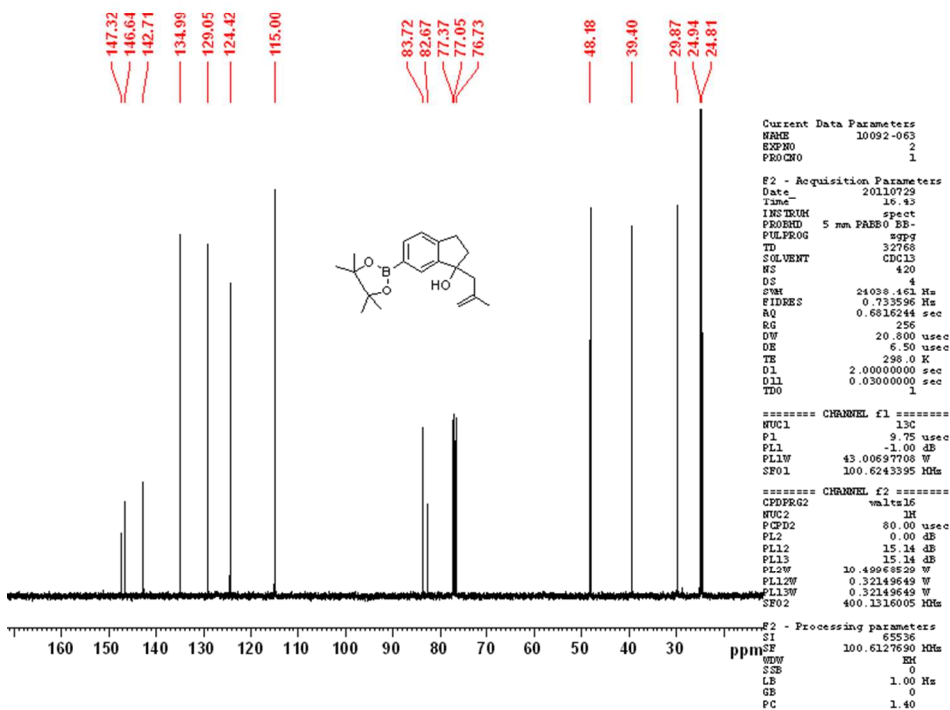

# Ethyl 3-hydroxy-3-(2-methoxyphenyl)-5-methylhex-5-enoate 37

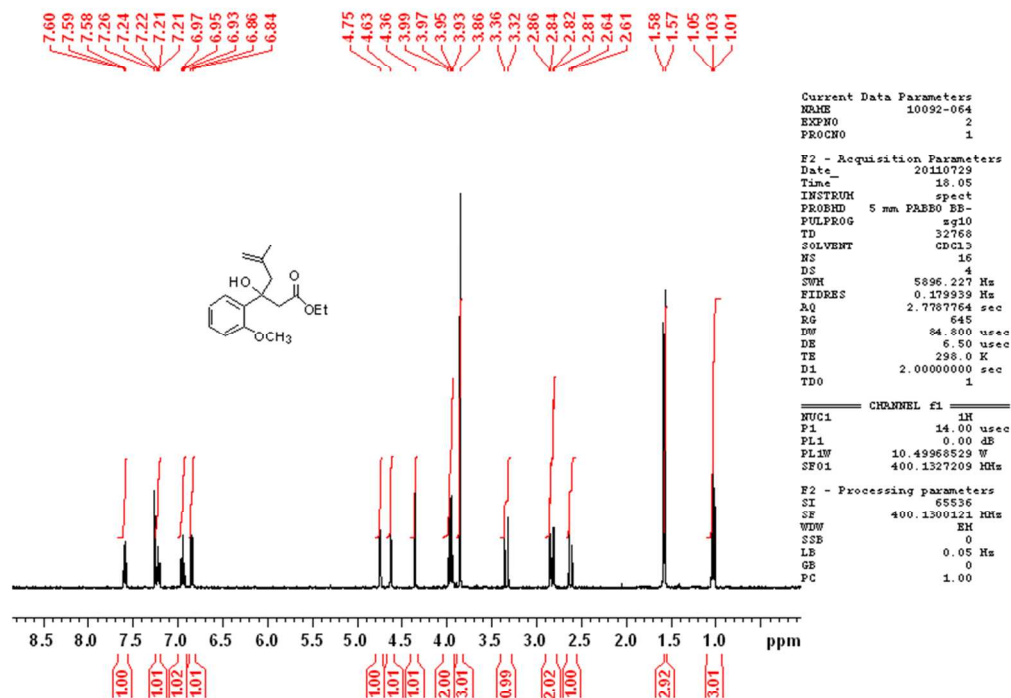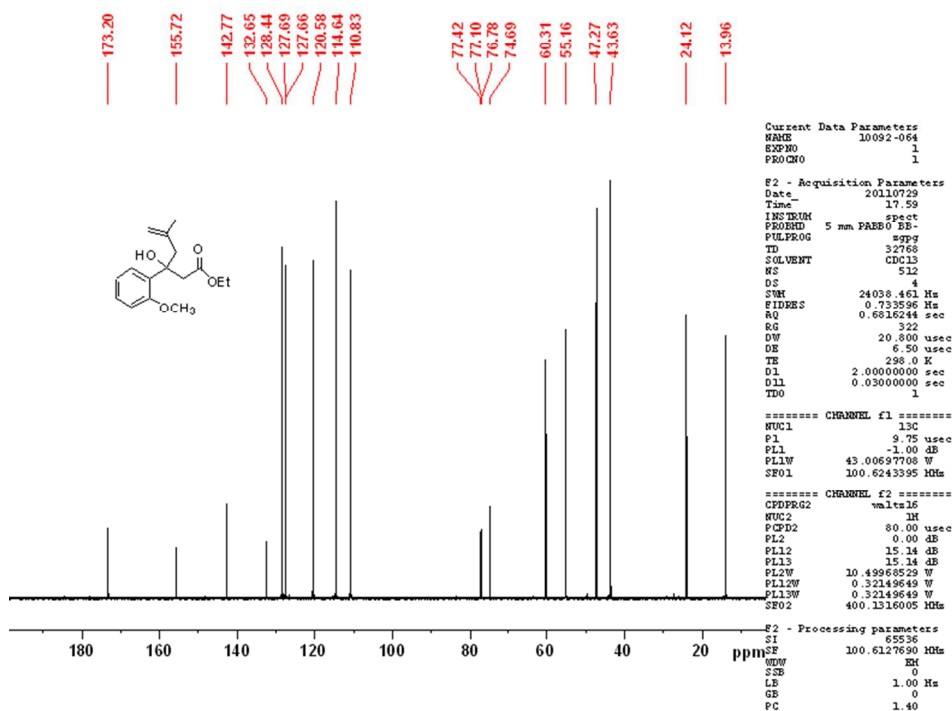

# 2-(2-Methylallyl)-1,2,3,4-tetrahydronaphthalene-2,6-diol 39

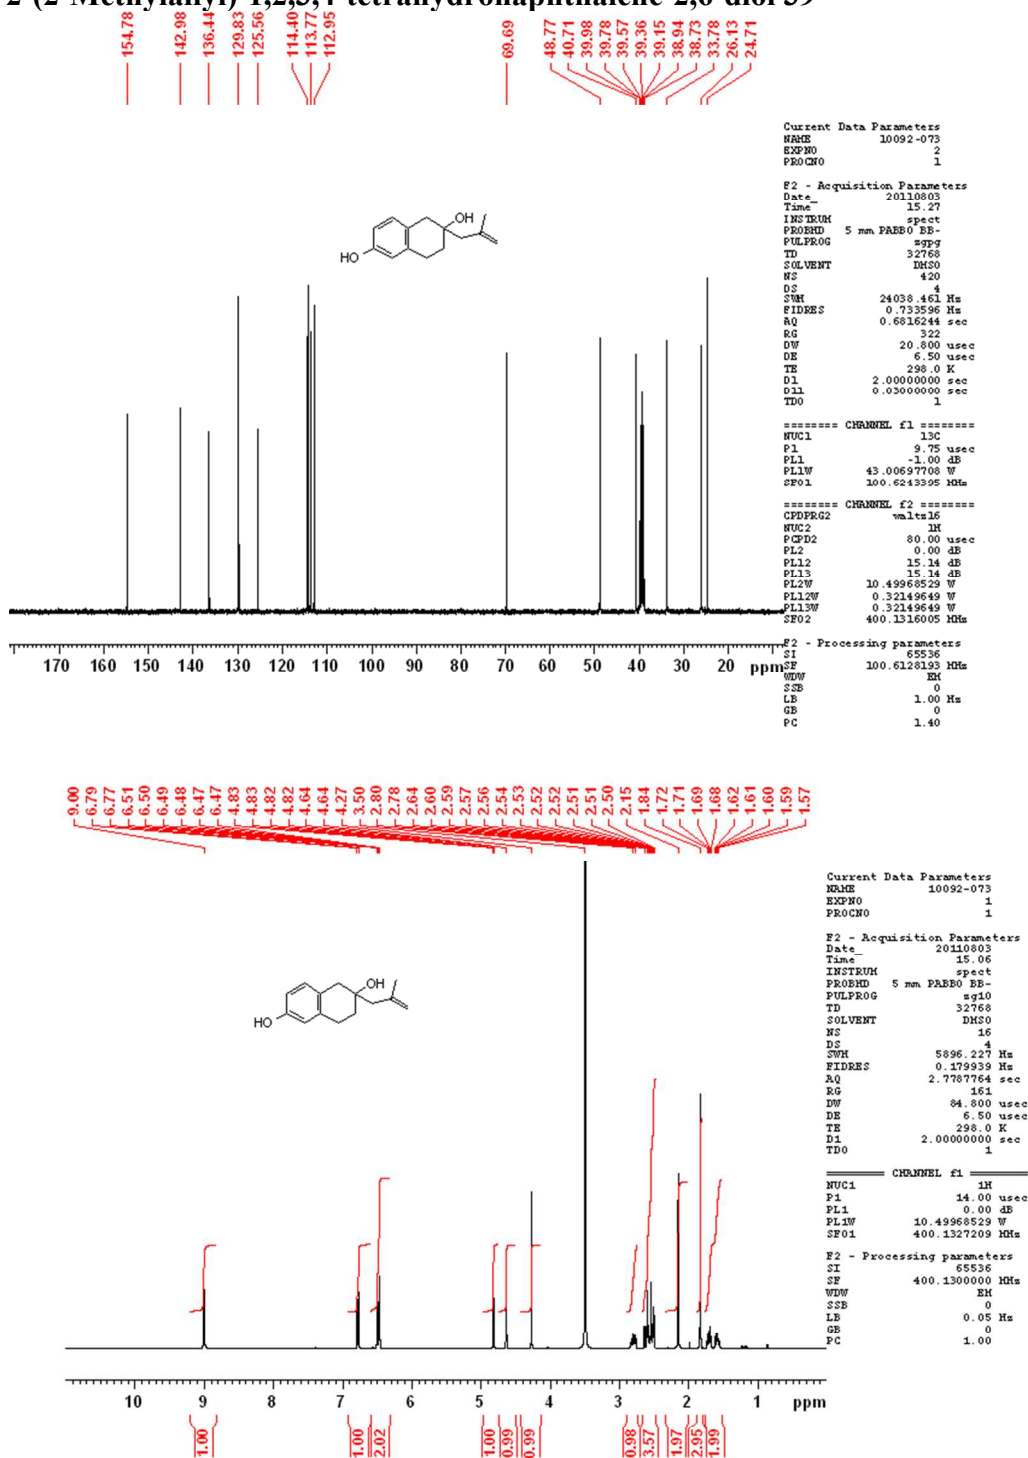

Supplement: Supplementary file 1 [file 4047553]
